# Supplementary material for: Intratumoral Genomic Heterogeneity May Hinder Precision Medicine Strategies in Patients with Serous Ovarian Carcinoma
Source: PubMed Central journal article supplement (PMC7235797; doi:10.3390/diagnostics10040200), 2020-04-03
Supplement: diagnostics-10-00200-s001.pdf [file diagnostics-10-00200-s001.pdf]

**Supplemental Table S1.** Total of 160 genes examined in the PleSSision test

|        |        |        |          |         |          |        |         |
|--------|--------|--------|----------|---------|----------|--------|---------|
| ABL1   | AKT1   | AKT2   | ALK      | AMER1   | APC      | AR     | ARID1A  |
| ARID2  | ASXL1  | ATM    | ATRX     | BAP1    | BCL6     | BCOR   | BRAF    |
| BRCA1  | BRCA2  | BRIP1  | BTK      | BUB1B   | CARD11   | CBL    | CBLB    |
| CD79A  | CD79B  | CDC73  | CDH1     | CDK12   | CDK4     | CDKN2A | CHEK2   |
| CIC    | CREBBP | CRLF2  | CSF1R    | CTNNB1  | CYLD     | DAXX   | DDB2    |
| DDR2   | DICER1 | DNMT3A | ECT2L    | EGFR    | EP300    | EPCAM  | ERBB2   |
| ERBB3  | ERBB4  | ERCC5  | ESR1     | EZH2    | FAM46C   | FANCA  | FANCD2  |
| FANCE  | FAS    | FBXO11 | FBXW7    | FGFR2   | FGFR3    | FH     | FLCN    |
| FLT3   | FUBP1  | GATA1  | GATA2    | GATA3   | GNA11    | GNAQ   | GNAS    |
| GPC3   | GRIN2A | H3F3A  | HIST1H3B | HNF1A   | HRAS     | HSPH1  | IDH1    |
| IDH2   | IKZF1  | IL6ST  | IL7R     | JAK1    | JAK2     | JAK3   | KDM6A   |
| KDR    | KIT    | KLF6   | KMT2D    | KRAS    | MAP2K1   | MAP2K2 | MAP2K4  |
| MAP3K1 | MAP4K3 | MDM2   | MED12    | MEN1    | MET      | MLH1   | MSH2    |
| MSH6   | MTOR   | MUTYH  | MYC      | MYD88   | NF1      | NF2    | NFE2L2  |
| NFKBIA | NOTCH1 | NOTCH2 | NPM1     | NRAS    | PALB2    | PAX5   | PBRM1   |
| PDGFRA | PHF6   | PIK3CA | PIK3R1   | PMS2    | PPP2R1A  | PRDM1  | PRKAR1A |
| PTCH1  | PTEN   | PTPN11 | RAC1     | RB1     | RET      | ROS1   | SDHB    |
| SETD2  | SF3B1  | SLC7A8 | SMAD4    | SMARCA4 | SMARCB1  | SMO    | SPOP    |
| SRC    | STK11  | SUFU   | TERT     | TNFAIP3 | TNFRSF14 | TP53   | TSC1    |
| TSC2   | TSHR   | U2AF1  | VHL      | WT1     | XPC      | ZNF2   | ZRSR2   |
